# Supplementary material for: Biocompatible Calcium Ion-Doped Magnesium Ferrite Nanoparticles as a New Family of Photothermal Therapeutic Materials for Cancer Treatment
Source: MDPI journal article supplement (doi:10.3390/pharmaceutics15051555), 2023-05-21
Supplement: s1 [file s1]

# Biocompatible calcium ion-doped magnesium ferrite nanoparticles as a new family of photothermal therapeutic materials for cancer treatment

Panchanathan Manivasagan <sup>1†</sup>, Sekar Ashokkumar <sup>2†</sup>, Ala Manohar <sup>3†</sup>, Ara Joe <sup>1</sup>, Hyo-Won Han <sup>1</sup>, Sun-Hwa Seo <sup>1</sup>, Thavasyappan Thambi <sup>4</sup>, Hai-Sang Duong <sup>5</sup>, Nagendra Kumar Kaushik <sup>2</sup>, Ki Hyeon Kim <sup>3</sup>, Eun Ha Choi <sup>2\*</sup>, and Eue-Soon Jang <sup>1,\*</sup>

<sup>1</sup> Department of Applied Chemistry, Kumoh National Institute of Technology, Daehak-ro 61, Gumi, Gyeongbuk 39177, Republic of Korea; manimaribtech@gmail.com (P. M.); jar@kumoh.ac.kr ([A.J.](mailto:A.J.)); 20101414hyowon@kumoh.ac.kr ([H.-W.H.](mailto:H.-W.H.)); 20126051@kumoh.ac.kr ([S.-H.S.](mailto:S.-H.S.))

<sup>2</sup> Plasma Bioscience Research Centre, Applied Plasma Medicine Center, Department of Electrical and Biological Physics, Kwangwoon University, Seoul 01897, Republic of Korea; kumarebt@kw.ac.kr ([S.A.](mailto:S.A.)); kaushik.nagendra@kw.ac.kr (N.K.K.)

<sup>3</sup> Department of Physics, Yeungnam University, Gyeongsan 38541, Republic of Korea; amanohar.svu@gmail.com (A.M.)

<sup>4</sup> School of Chemical Engineering, Theranostic Macromolecules Research Center, Sungkyunkwan University, Suwon 16419, Republic of Korea; thambi@skku.edu (T.T.)

<sup>5</sup> Faculty of Applied Sciences, Ton Duc Thang University, Ho Chi Minh City, Vietnam. duonghaisang99@gmail.com (H.-S.D.)

\* Correspondence: euesoon@kumoh.ac.kr (E.-S.J.); ehchoi@kw.ac.kr (E.H.K.).

† P.M., S.A., and A.M. contributed equally to this work.

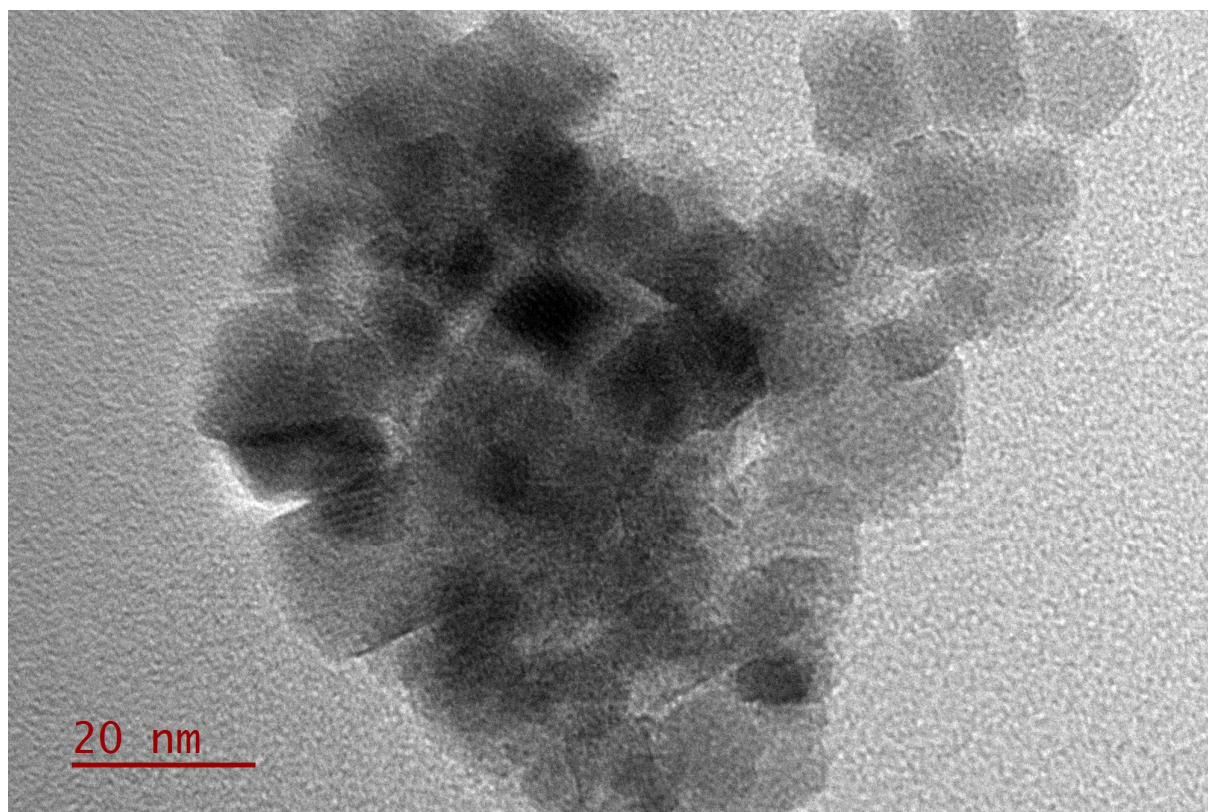

**Figure S1.** TEM image of  $\text{Ca}^{2+}$ -doped  $\text{MgFe}_2\text{O}_4$  NPs.

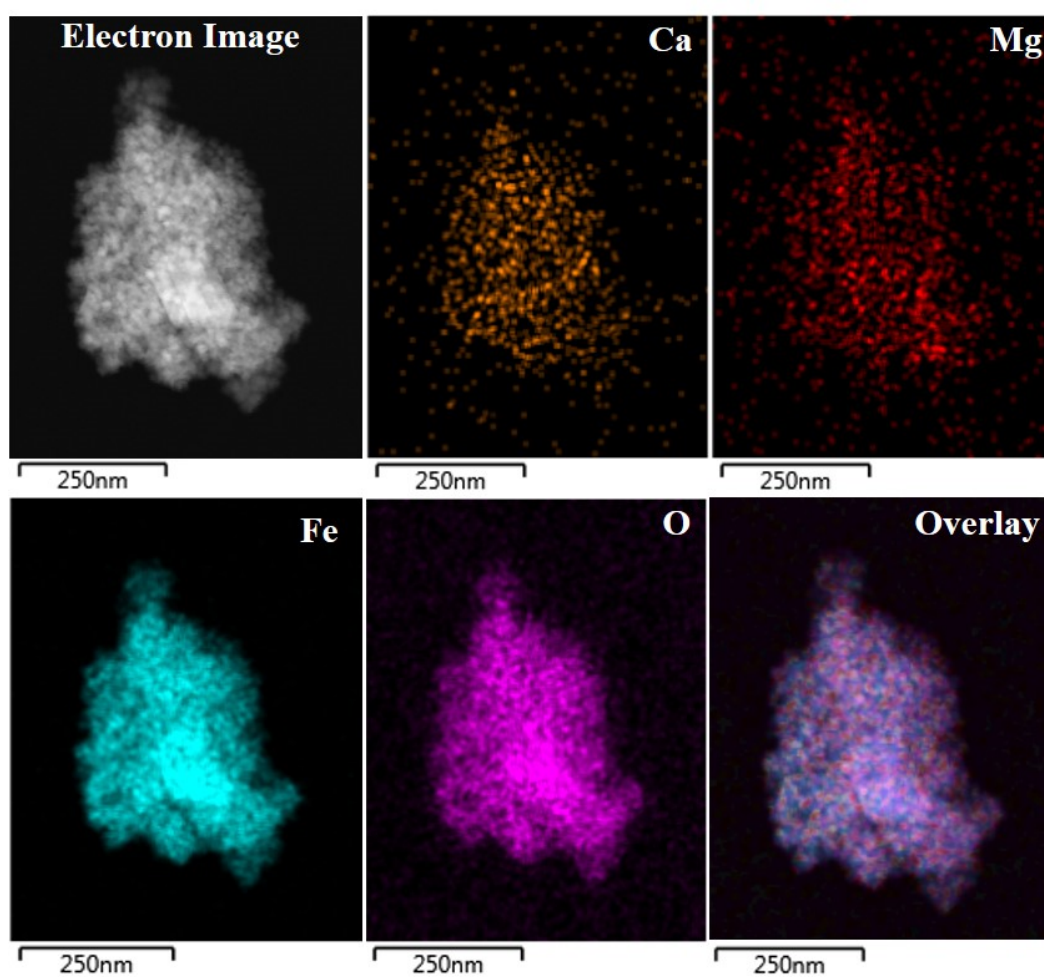

**Figure S2.** Cs-corrected FETEM with EDX mapping.

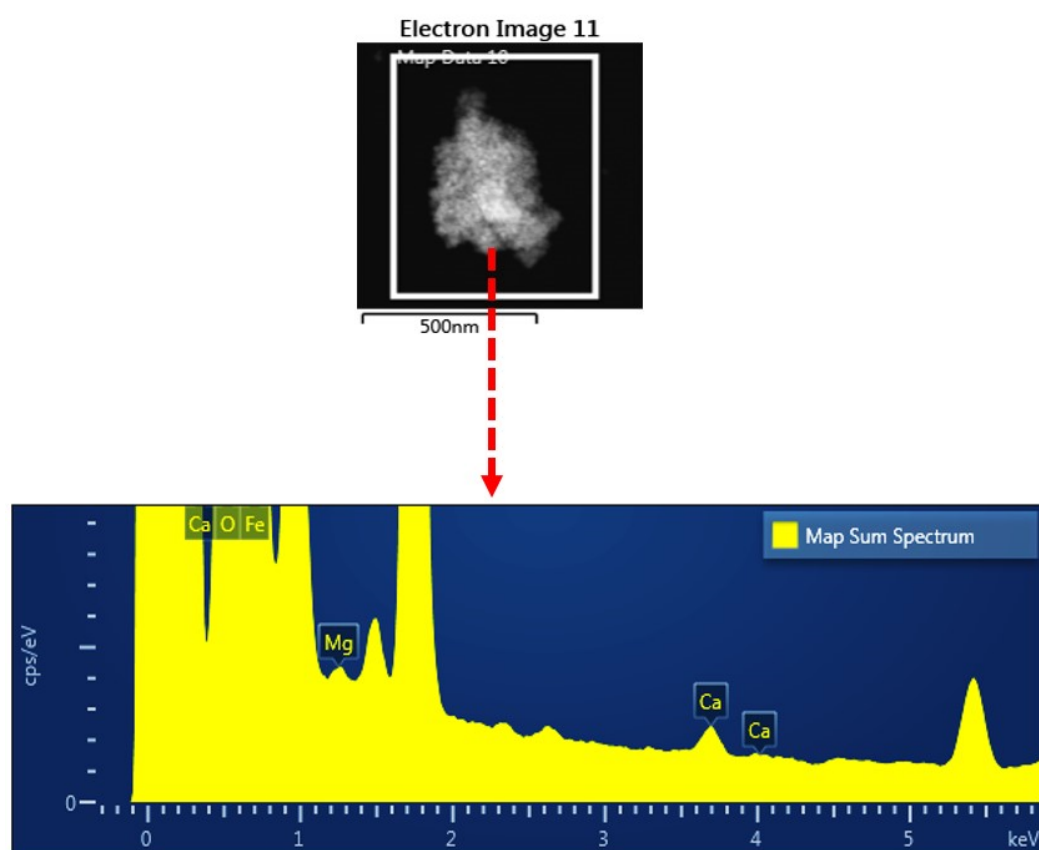

**Figure S3.** Cs-corrected FETEM with EDX spectroscopy.

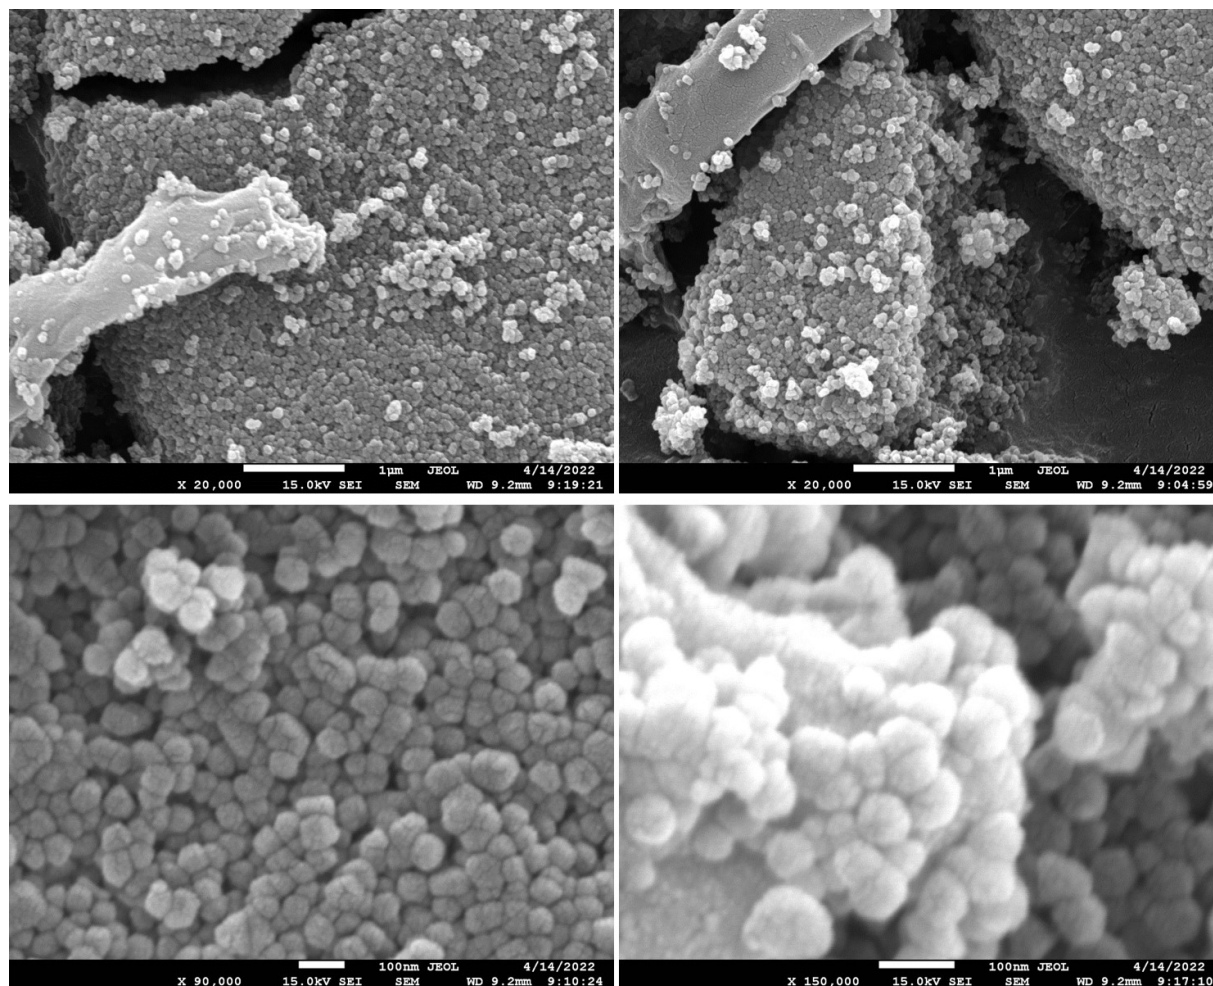

Figure S4. SEM images of  $\text{Ca}^{2+}$ -doped  $\text{MgFe}_2\text{O}_4$  NPs.



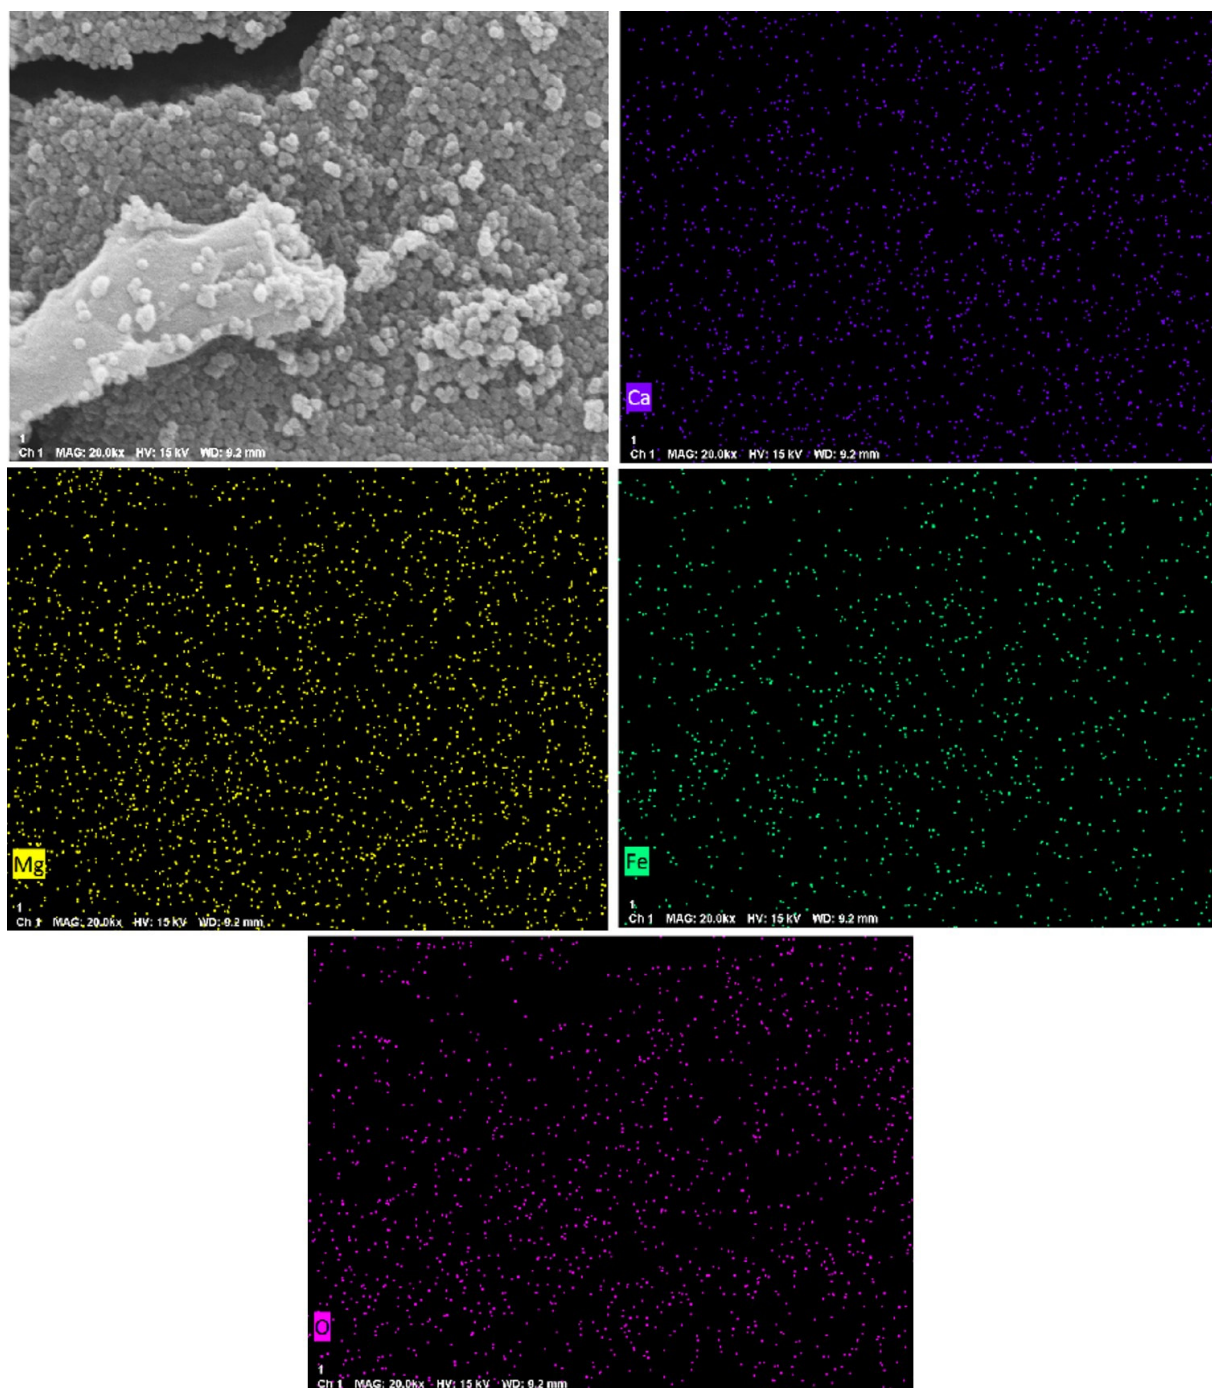

**Figure S5.** SEM with EDX mapping of  $\text{Ca}^{2+}$ -doped  $\text{MgFe}_2\text{O}_4$  NPs.

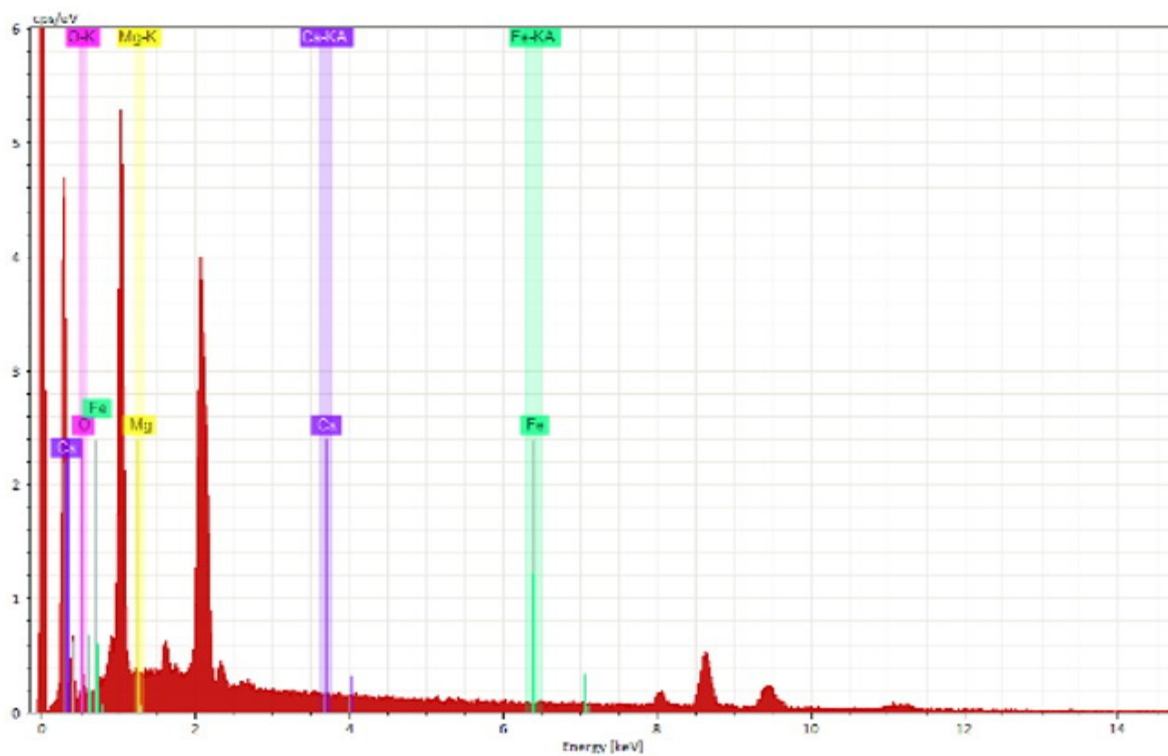

**Figure S6.** SEM-EDX spectra of  $\text{Ca}^{2+}$ -doped  $\text{MgFe}_2\text{O}_4$  NPs.

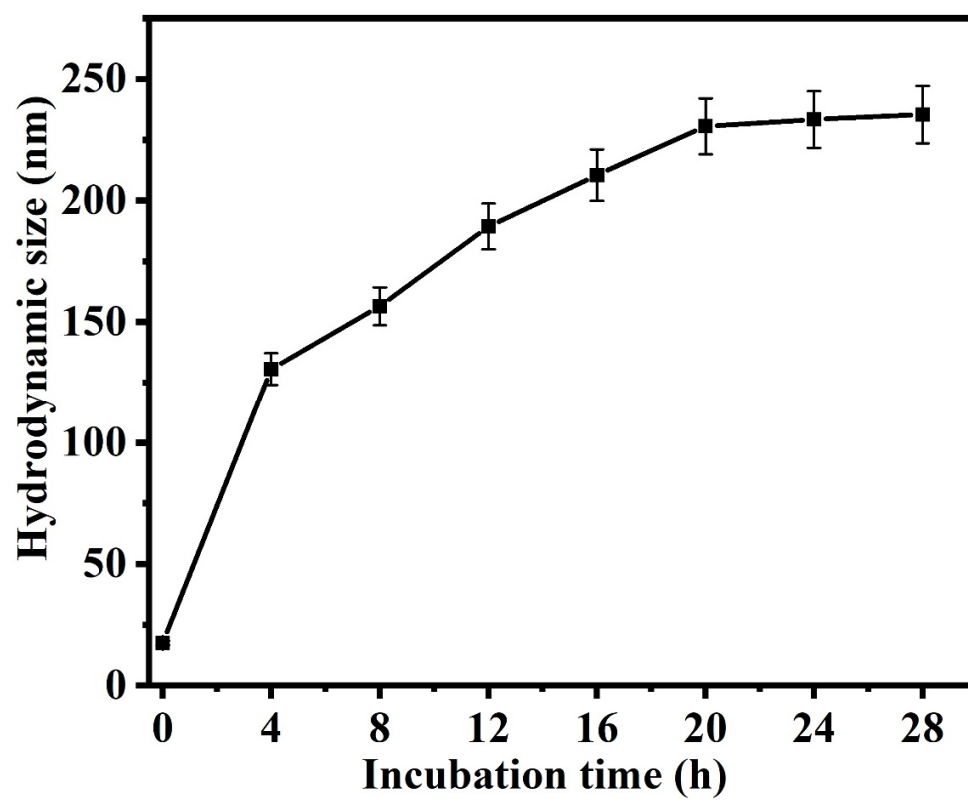

**Figure S7.** Hydrodynamic size of  $\text{Ca}^{2+}$ -doped  $\text{MgFe}_2\text{O}_4$  NPs after incubation in RPMI medium supplemented with 10% FBS.



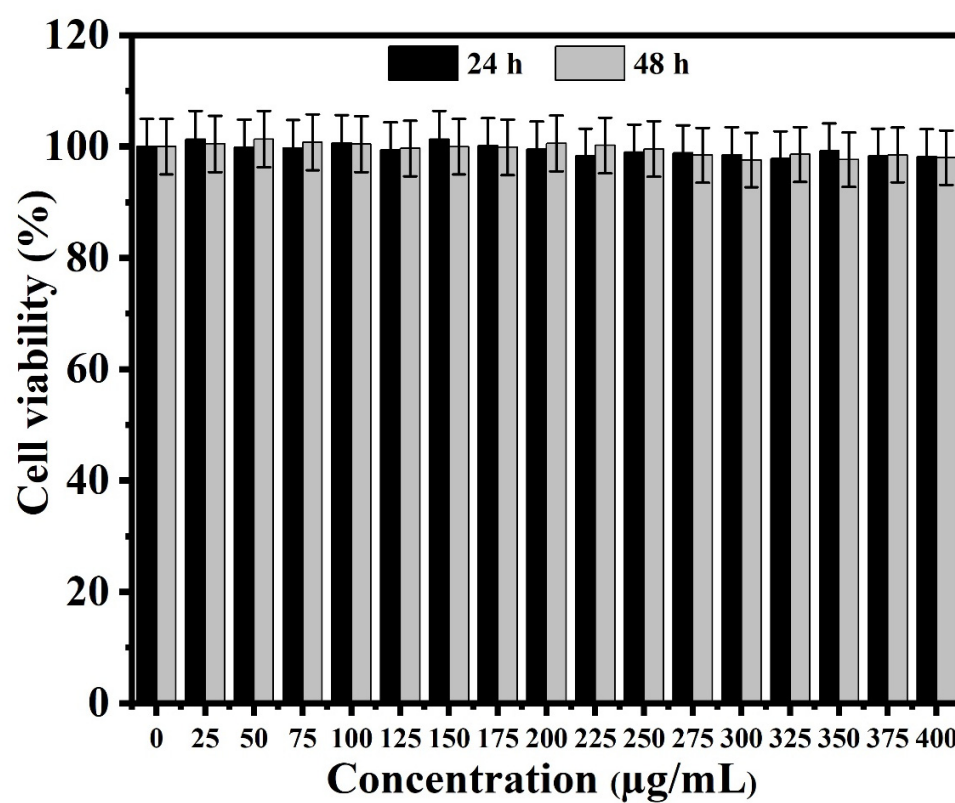

**Figure S8.** *In vitro* biocompatibility of Ca<sup>2+</sup>-doped MgFe<sub>2</sub>O<sub>4</sub> NPs at various concentrations on HDF cells after 24 h and 48 h.

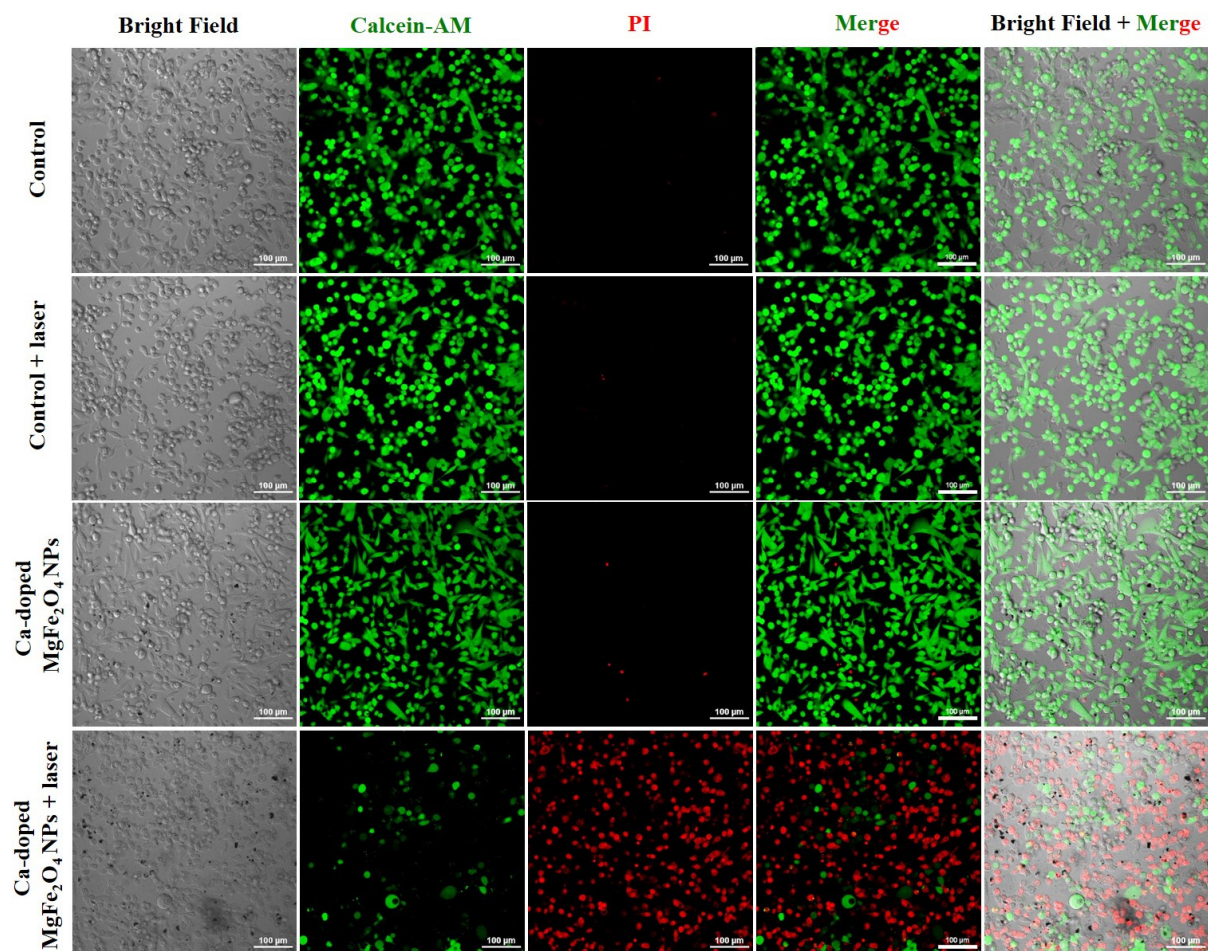

**Figure S9.** Confocal laser scanning microscope images of MDA-MB-231 cells treated with PBS only, PBS + laser irradiation, Ca<sup>2+</sup>-doped MgFe<sub>2</sub>O<sub>4</sub> NPs only, and Ca<sup>2+</sup>-doped MgFe<sub>2</sub>O<sub>4</sub> NPs + laser irradiation. Calcein-AM (green) and PI (red) were used to distinguish between live and dead cells (20 × magnification; scale bar: 100 μm).

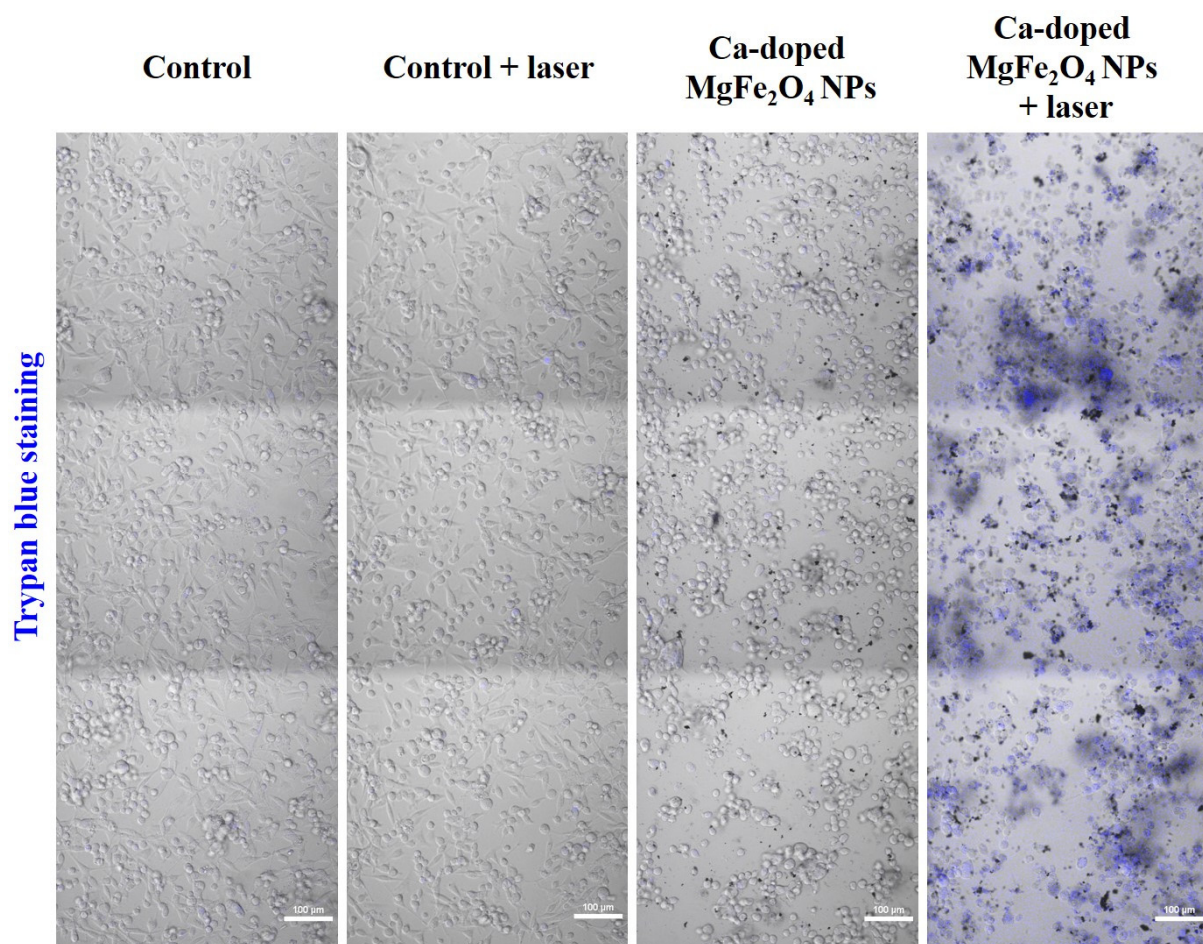

**Figure S10.** Optical images of trypan blue stained MDA-MB-231 cells treated with PBS only, PBS + laser irradiation, Ca<sup>2+</sup>-doped MgFe<sub>2</sub>O<sub>4</sub> NPs only, and Ca<sup>2+</sup>-doped MgFe<sub>2</sub>O<sub>4</sub> NPs + laser irradiation (20 × magnification; scale bar: 100 μm).



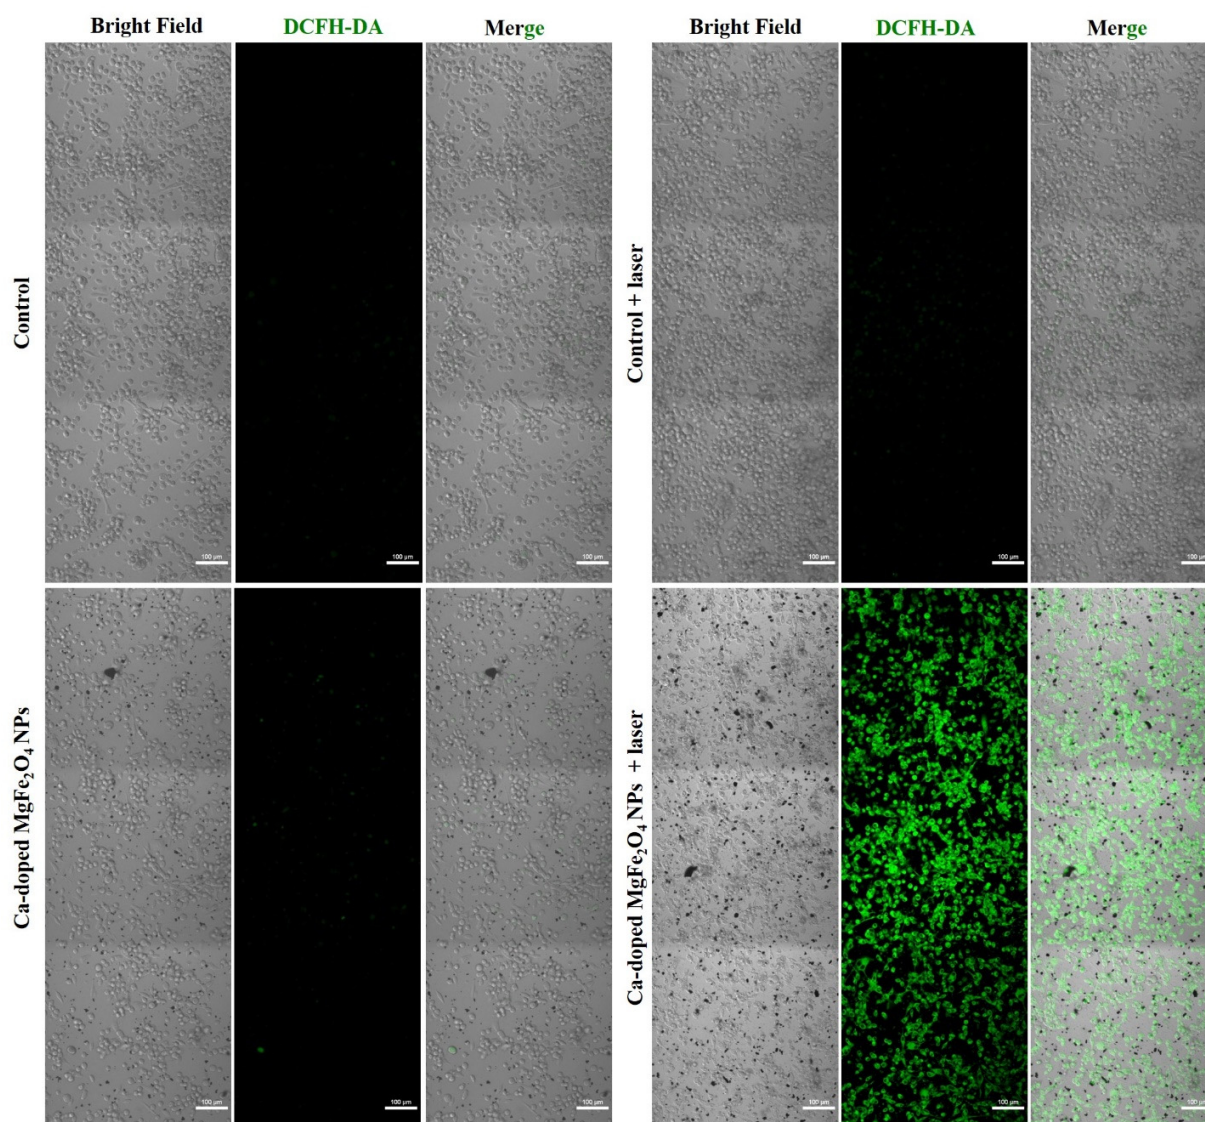

**Figure S11.** Confocal laser scanning microscopy images of DCFH-DA-stained MDA-MB-231 cells treated with PBS only, PBS + laser irradiation, Ca<sup>2+</sup>-doped MgFe<sub>2</sub>O<sub>4</sub> NPs only, and Ca<sup>2+</sup>-doped MgFe<sub>2</sub>O<sub>4</sub> NPs + laser irradiation, for determining the intracellular ROS level (20 × magnification; scale bar: 100 μm).

**Table S1. Comparative study of the photothermal effect of Ca<sup>2+</sup>-doped MgFe<sub>2</sub>O<sub>4</sub> NPs and various ferrite NPs.**

| NPs                                                          | Cell line        | <i>In vitro</i> biocompatibility test (%) | Laser                                  | Temp (°C) | Photothermal conversion efficiency (( $\eta$ )) | <i>In vitro</i> PTT (%) | References |
|--------------------------------------------------------------|------------------|-------------------------------------------|----------------------------------------|-----------|-------------------------------------------------|-------------------------|------------|
| Ca <sup>2+</sup> -doped MgFe <sub>2</sub> O <sub>4</sub> NPs | MDA-MB-231 cells | 94.5%                                     | 785 nm, 0.8 W/cm <sup>2</sup> , 5 min  | 51.7 °C   | 30.12%                                          | 32.37%                  |            |
| <b>Comparison of various ferrite NPs</b>                     |                  |                                           |                                        |           |                                                 |                         |            |
| ZnFe <sub>2</sub> O <sub>4</sub> NPs                         | A549 cells       | > 80%                                     | 808 nm, 2.0 W/cm <sup>2</sup> , 10 min | 69.0 °C   | 37.7%                                           | 26.9%                   | [1]        |
| GO/MnFe <sub>2</sub> O <sub>4</sub> NPs                      | HeLa cells       | > 92%                                     | 808 nm, 0.5 W/cm <sup>2</sup> , 10 min | 43 °C     | -                                               | 32.1%                   | [2]        |
| Bismuth ferrite NPs (BFO NPs)                                | HepG2 cells      | > 90%                                     | 808 nm, 1.0 W/cm <sup>2</sup> , 10 min | 52.4 °C   | 51.4%                                           | 32.3%                   | [3]        |
| MgFe <sub>2</sub> O <sub>4</sub> NPs                         | HePG2 cells      | > 90%                                     | 808 nm, 1.0 W/cm <sup>2</sup> , 4 min  | 45.7 °C   | -                                               | 12.0%                   | [4]        |

## References

1. Wang, K.; Yang, P.; Guo, R.; Yao, X.; Yang, W. Photothermal performance of MFe<sub>2</sub>O<sub>4</sub> nanoparticles. *Chin. Chem. Lett.* **2019**, *30*, 2013-2016.
2. Yang, Y.; Shi, H.; Wang, Y.; Shi, B.; Guo, L.; Wu, D.; Yang, S.; Wu, H. Graphene oxide/manganese ferrite nanohybrids for magnetic resonance imaging, photothermal therapy and drug delivery. *J. Biomater. Appl.* **2016**, *30*, 810-822.
3. Yang, C.; Chen, Y.; Guo, W.; Gao, Y.; Song, C.; Zhang, Q.; Zheng, N.; Han, X.; Guo, C. Bismuth ferrite-based nanoplatfrom design: an ablation mechanism study of solid tumor and NIR-triggered photothermal/photodynamic combination cancer therapy. *Adv. Funct. Mater.* **2018**, *28*, 1706827.
4. Qiu, E.; Chen, X.; Yang, D.-P.; Regulacio, M.D.; Ramos, R.M.C.R.; Luo, Z.; Wu, Y.-L.; Lin, M.; Li, Z.; Loh, X.J. Fabricating Dual-Functional Plasmonic-Magnetic Au@ MgFe<sub>2</sub>O<sub>4</sub> Nanohybrids for Photothermal Therapy and Magnetic Resonance Imaging. *ACS Omega* **2022**, *7*, 2031-2040.
